# Supplementary material
Source: publisher site journal article supplement (https://www.dovepress.com/article/286169)
Supplement: Supplementary file 1 [file get_supplementary_file.php]

**Supplementary Table 1.** Baseline Characteristics in Patients with Different Types of PVTT

| Characteristics | Type A  n=11 | Type B  n=20 | Type C  n=32 | P value |
| --- | --- | --- | --- | --- |
| Gender |  |  |  | 0.379 |
| Male, n (%) | 9 (81.8) | 19 (95.0) | 30 (93.8) |  |
| Female, n (%) | 2 (18.2) | 1 (5.0) | 2 (6.2) |  |
| Age (y) | 51.1 ± 8.9 | 48.2 ± 10.8 | 18.2 ± 10.9 | 0.692 |
| ECOG performance |  |  |  | 0.572 |
| 0, n (%) | 4 (36.4) | 8 (40.0) | 12 (37.5) |  |
| 1, n (%) | 2 (18.2) | 8 (40.0) | 11 (34.4) |  |
| 2, n (%) | 3 (27.3) | 3 (15.0) | 8 (25.0) |  |
| 3, n (%) | 2 (18.2) | 1 (5.0) | 1 (3.1) |  |
| Child-Pugh class |  |  |  | 0.053 |
| A, n (%) | 7 (63.6) | 19 (95.0) | 28 (87.5) |  |
| B, n (%) | 4 (14.3) | 1 (5.0) | 4 (12.5) |  |
| HBeAg |  |  |  | 0.284 |
| Positive, n (%) | 5 (45.5) | 13 (65.0) | 23 (71.9) |  |
| Negative, n (%) | 6 (54.5) | 7 (35.0) | 9 (28.1) |  |
| WBC (109/L) | 5.5 ± 2.7 | 6.3 ± 3.1 | 5.8 ± 2.8 | 0.674 |
| ALT (U/L) | 40.3 ± 17.7 | 52.4 ± 45.3 | 35.3 ± 18.6 | 0.217 |
| AST (U/L) | 94.5 ± 91.2 | 60.2 ± 51.3 | 56.0 ± 47.5 | 0.142 |
| PLT (109/L) | 229.4 ± 143.3 | 165.0 ± 73.5 | 160.0 ± 70.0 | 0.057 |
| PT (s) | 13.1 ± 0.9 | 13.0 ± 1.3 | 12.4 ± 1.2 | 0.225 |
| Total bilirubin level (mmol/L) | 16.7 ± 7.8 | 19.0 ± 7.9 | 20.2 ± 13.9 | 0.644 |
| Albumin level (g/L) | 39.3 ± 4.6 | 37.1 ± 3.7 | 38.7 ± 6.0 | 0.409 |
| a-Fetoprotein level (ng/mL) |  |  |  | 0.051 |
| ≥400, n (%) | 2 (18.2) | 8 (40.0) | 19 (59.4) |  |
| <400, n (%) | 9 (81.8) | 12 (60.0) | 13 (40.6) |  |
| Tumor number |  |  |  | 0.061 |
| Single, n (%) | 3 (27.3) | 8 (40.0) | 19 (59.4) |  |
| Multiple, n (%) | 8 (72.7) | 12 (60.0) | 13 (40.6) |  |
| Tumor Size (cm) |  |  |  | 0.799 |
| <7cm, n (%) | 6 (54.5) | 10 (50.0) | 14 (43.8) |  |
| ≥7cm, n (%) | 5 (45.5) | 10 (50.0) | 18 (56.2) |  |
| Prior anti-tumor therapy |  |  |  | 0.472 |
| TACE, n (%) | 5 (45.4) | 11 (55.0) | 15 (46.9) |  |
| HAIC, n (%) | 1 (9.1) | 2 (10.0) | 4 (12.5) |  |
| Sorafenib, n (%) | 2 (18.2) | 3 (15.0) | 3 (9.4) |  |
| Lenvatinib, n (%) | 1 (9.1) | 1 (5.0) | 5 (15.6) |  |
| unknown, n (%) | 2 (18.2) | 3 (15.0) | 6 (18.8) |  |
| Mean follow up (months) | 7.4 ± 3.8 | 13.2 ± 4.1 | 14.1 ± 3.6 | 0.479 |

Note.—**ECOG**, Eastern Cooperative Oncology Group; **WBC**, White blood cell; **ALT**, alanine aminotransferase; **AST**, aspartate aminotransferase; **PLT**, platelet count; **PT**, prothrombin time; **TBIL**, total bilirubin; **ALB**, albumin; **AFP**, α-fetoprotein; **PVTT**, portal vein tumor thrombus; **TACE,** transarterial chemoembolization; **HAIC,** hepatic arterial infusion chemotherapy.
